# Supplementary material for: miR-592/WSB1/HIF-1α axis inhibits glycolytic metabolism to decrease hepatocellular carcinoma growth
Source: PubMed Central journal article supplement (PMC5085226; doi:10.18632/oncotarget.9135), 2016-05-02
Supplement: oncotarget-07-35257-s001.pdf [file oncotarget-07-35257-s001.pdf]

# miR-592/WSB1/HIF-1 $\alpha$ axis inhibits glycolytic metabolism to decrease hepatocellular carcinoma growth

## SUPPLEMENTARY FIGURES AND TABLE

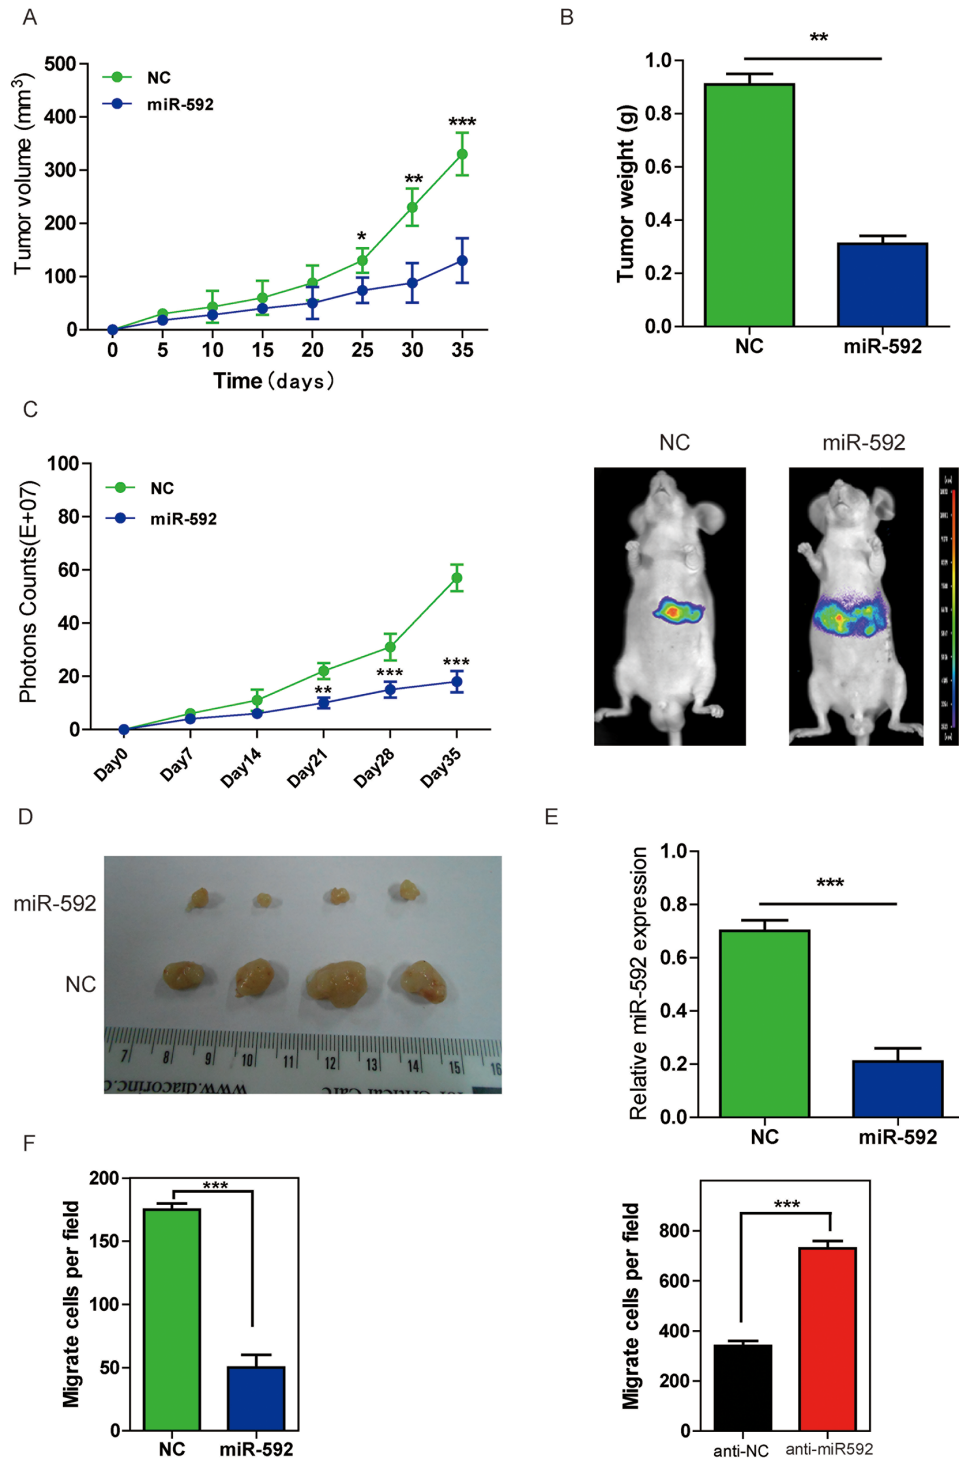

Supplementary Figure S1:

A

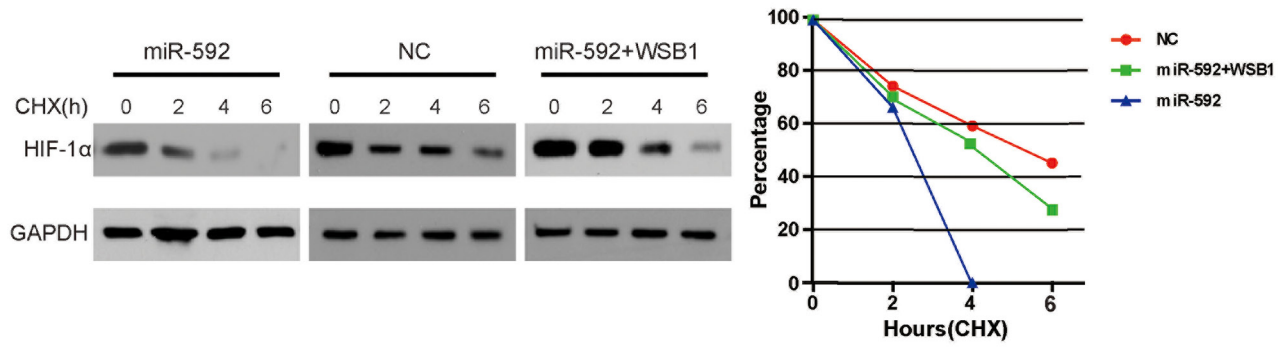

B

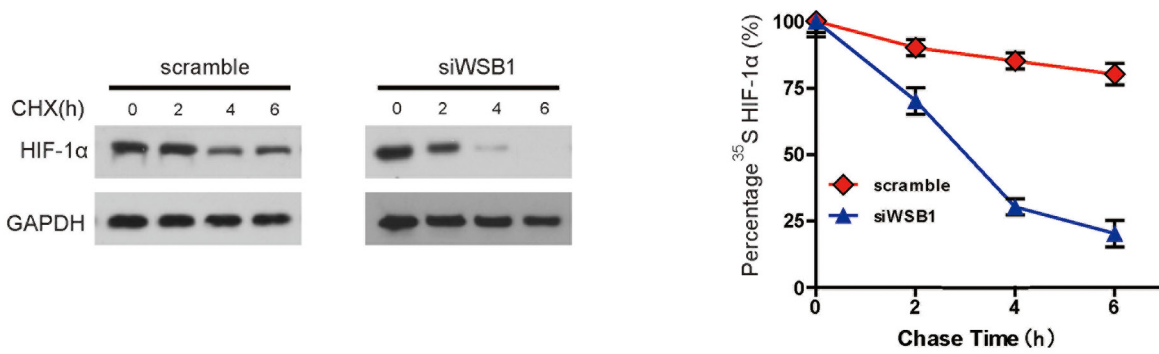

Supplementary Figure S2:

Supplementary Table S1:

See Supplementary File 1
